# Supplementary material for: Population-Genomic Insights into Variation in Prevotella intermedia and Prevotella nigrescens Isolates and Its Association with Periodontal Disease
Source: Front Cell Infect Microbiol. 2017 Sep 21;7:409. doi: 10.3389/fcimb.2017.00409 (PMC5613308; doi:10.3389/fcimb.2017.00409)
Supplement: Supplementary file 4 [file Table4.XLSX]

## Sheet: 2_uniq_sequence
Table S4 Unique genes in Pi-health
Gene ID	Contig ID	CDS	Start	End	Strand	Gene Name	Function	Function description
Pijiankang-group2_00044	NODE_101_length_11668_cov_7.71513	CDS	1181	1519	+	-	hypothetical protein
Pijiankang-group2_00045	NODE_101_length_11668_cov_7.71513	CDS	1557	2516	+	-	hypothetical protein
Pijiankang-group2_00054	NODE_101_length_11668_cov_7.71513	CDS	7249	8337	+	-	hypothetical protein
Pijiankang-group2_00056	NODE_101_length_11668_cov_7.71513	CDS	8919	9224	+	-	hypothetical protein
Pijiankang-group2_00108	NODE_1052_length_2196_cov_7.11555	CDS	1670	1801	-	-	hypothetical protein
Pijiankang-group2_00156	NODE_107_length_11169_cov_7.44507	CDS	3439	4587	-	-	hypothetical protein
Pijiankang-group2_00157	NODE_107_length_11169_cov_7.44507	CDS	4643	5635	-	-	Fucose 4-O-acetylase	Integral component of membrane
Pijiankang-group2_00158	NODE_107_length_11169_cov_7.44507	CDS	5632	6684	-	-	hypothetical protein
Pijiankang-group2_00159	NODE_107_length_11169_cov_7.44507	CDS	6691	7887	-	-	sugar transferase PEP-CTERM/EpsH1 system associated	Exopolysaccharide synthesis
Pijiankang-group2_00160	NODE_107_length_11169_cov_7.44507	CDS	7891	8931	-	gspA	General stress protein A
Pijiankang-group2_00161	NODE_107_length_11169_cov_7.44507	CDS	9127	10671	-	-	Polysaccharide biosynthesis protein
Pijiankang-group2_00261	NODE_112_length_10872_cov_9.47884	CDS	1036	2031	-	-	Virulence protein
Pijiankang-group2_00262	NODE_112_length_10872_cov_9.47884	CDS	2078	4243	-	-	hypothetical protein
Pijiankang-group2_00263	NODE_112_length_10872_cov_9.47884	CDS	4316	6544	-	-	LlaJI restriction endonuclease	Integral component of membrane
Pijiankang-group2_00264	NODE_112_length_10872_cov_9.47884	CDS	6558	8651	-	ydiS	Type-2 restriction enzyme BsuMI component YdiS
Pijiankang-group2_00265	NODE_112_length_10872_cov_9.47884	CDS	8635	9846	-	banIM_1	Modification methylase BanI	DNA restriction-modification system
Pijiankang-group2_00332	NODE_1178_length_1969_cov_10.5454	CDS	1335	1628	+	-	hypothetical protein
Pijiankang-group2_00511	NODE_1279_length_1832_cov_11.6025	CDS	1345	1482	+	-	hypothetical protein
Pijiankang-group2_00676	NODE_1399_length_1696_cov_33.2771	CDS	1359	1616	+	-	hypothetical protein
Pijiankang-group2_00826	NODE_149_length_8739_cov_9.74014	CDS	6776	7153	+	-	Metal-dependent amidase/aminoacylase/carboxypeptidase
Pijiankang-group2_00893	NODE_156_length_8350_cov_11.4232	CDS	893	1762	+	-	hypothetical protein
Pijiankang-group2_00894	NODE_156_length_8350_cov_11.4232	CDS	1766	3046	+	-	hypothetical protein
Pijiankang-group2_00896	NODE_156_length_8350_cov_11.4232	CDS	3636	4268	+	-	hypothetical protein
Pijiankang-group2_00949	NODE_15_length_29539_cov_13.4619	CDS	20775	21227	+	-	hypothetical protein
Pijiankang-group2_00955	NODE_15_length_29539_cov_13.4619	CDS	24348	24788	+	-	hypothetical protein
Pijiankang-group2_00957	NODE_15_length_29539_cov_13.4619	CDS	25408	25641	+	-	hypothetical protein
Pijiankang-group2_01144	NODE_179_length_7686_cov_27.0552	CDS	4324	4518	-	-	hypothetical protein
Pijiankang-group2_01203	NODE_184_length_7477_cov_8.06524	CDS	4616	5695	+	-	hypothetical protein
Pijiankang-group2_01204	NODE_184_length_7477_cov_8.06524	CDS	6014	7243	+	-	hypothetical protein
Pijiankang-group2_01212	NODE_186_length_7453_cov_2.48473	CDS	686	1276	+	-	hypothetical protein
Pijiankang-group2_01213	NODE_186_length_7453_cov_2.48473	CDS	1245	1703	+	-	RHS Repeat
Pijiankang-group2_01214	NODE_186_length_7453_cov_2.48473	CDS	1700	1867	+	-	hypothetical protein
Pijiankang-group2_01215	NODE_186_length_7453_cov_2.48473	CDS	1819	3990	+	cirA_1	Colicin I receptor precursor	Ion transport
Pijiankang-group2_01216	NODE_186_length_7453_cov_2.48473	CDS	4046	5272	+	-	hypothetical protein
Pijiankang-group2_01256	NODE_1906_length_1294_cov_38.3974	CDS	720	914	-	-	hypothetical protein
Pijiankang-group2_01627	NODE_2173_length_1138_cov_22.0756	CDS	718	954	-	-	hypothetical protein
Pijiankang-group2_01703	NODE_225_length_6492_cov_8.4778	CDS	2267	4060	-	-	hypothetical protein
Pijiankang-group2_01704	NODE_225_length_6492_cov_8.4778	CDS	4084	4623	-	-	putative ATP-binding protein involved in virulence
Pijiankang-group2_01843	NODE_243_length_6100_cov_23.3998	CDS	5719	5811	+	-	hypothetical protein
Pijiankang-group2_01879	NODE_248_length_5977_cov_10.3037	CDS	2819	4822	+	-	helicase%2C RecD/TraA family	DNA repair
Pijiankang-group2_01880	NODE_248_length_5977_cov_10.3037	CDS	4822	5496	+	-	hypothetical protein
Pijiankang-group2_01958	NODE_25_length_23738_cov_2.91723	CDS	13733	14074	+	-	hypothetical protein
Pijiankang-group2_01964	NODE_25_length_23738_cov_2.91723	CDS	17977	19677	+	-	hypothetical protein
Pijiankang-group2_02059	NODE_26_length_23561_cov_8.41848	CDS	8090	10507	-	-	hypothetical protein
Pijiankang-group2_02060	NODE_26_length_23561_cov_8.41848	CDS	10497	11798	-	-	pyrroloquinoline quinone biosynthesis protein PqqE	Metal binding
Pijiankang-group2_02061	NODE_26_length_23561_cov_8.41848	CDS	11863	12066	-	-	hypothetical protein
Pijiankang-group2_02093	NODE_273_length_5638_cov_9.57963	CDS	2515	4677	+	-	hypothetical protein
Pijiankang-group2_02099	NODE_2746_length_939_cov_9.42927	CDS	367	627	+	-	hypothetical protein
Pijiankang-group2_02291	NODE_293_length_5306_cov_8.51552	CDS	939	1787	+	-	hypothetical protein
Pijiankang-group2_02292	NODE_293_length_5306_cov_8.51552	CDS	1771	2931	+	-	hypothetical protein
Pijiankang-group2_03031	NODE_39_length_19456_cov_10.7931	CDS	324	1232	-	-	DNA protecting protein DprA	DNA binding
Pijiankang-group2_03032	NODE_39_length_19456_cov_10.7931	CDS	1229	2080	-	-	hypothetical protein
Pijiankang-group2_03033	NODE_39_length_19456_cov_10.7931	CDS	2112	2201	-	-	hypothetical protein
Pijiankang-group2_03034	NODE_39_length_19456_cov_10.7931	CDS	2205	3188	-	-	hypothetical protein
Pijiankang-group2_03153	NODE_415_length_4212_cov_11.7855	CDS	1607	2992	+	-	hypothetical protein
Pijiankang-group2_03154	NODE_415_length_4212_cov_11.7855	CDS	2996	3778	+	-	hypothetical protein
Pijiankang-group2_03181	NODE_41_length_19332_cov_10.2135	CDS	6057	10049	+	-	Calcineurin-like phosphoesterase	Integral component of membrane
Pijiankang-group2_03202	NODE_422_length_4169_cov_10.8509	CDS	948	1658	-	-	hypothetical protein
Pijiankang-group2_03203	NODE_422_length_4169_cov_10.8509	CDS	1864	2220	-	-	hypothetical protein
Pijiankang-group2_03204	NODE_422_length_4169_cov_10.8509	CDS	2361	2486	-	-	hypothetical protein
Pijiankang-group2_03346	NODE_4526_length_518_cov_7.18045	CDS	40	516	-	-	hypothetical protein
Pijiankang-group2_03362	NODE_454_length_3948_cov_9.8958	CDS	1158	2087	-	-	hypothetical protein
Pijiankang-group2_03382	NODE_4625_length_504_cov_31.6909	CDS	280	387	-	-	hypothetical protein
Pijiankang-group2_03546	NODE_510_length_3622_cov_8.23123	CDS	3018	3167	-	-	hypothetical protein
Pijiankang-group2_03556	NODE_514_length_3602_cov_7.77347	CDS	386	919	+	-	hypothetical protein
Pijiankang-group2_03575	NODE_521_length_3574_cov_6.83415	CDS	2331	2933	-	-	hypothetical protein
Pijiankang-group2_03583	NODE_528_length_3533_cov_9.70943	CDS	844	1110	+	-	hypothetical protein
Pijiankang-group2_03611	NODE_530_length_3515_cov_12.0492	CDS	2466	3218	+	-	hypothetical protein
Pijiankang-group2_03729	NODE_578_length_3314_cov_10.0717	CDS	1310	1453	+	-	hypothetical protein
Pijiankang-group2_03775	NODE_592_length_3295_cov_8.77897	CDS	633	2072	-	-	putative protein containing caspase domain protein
Pijiankang-group2_03776	NODE_592_length_3295_cov_8.77897	CDS	2069	2947	-	-	hypothetical protein
Pijiankang-group2_03984	NODE_683_length_2989_cov_16.8868	CDS	34	783	+	-	hypothetical protein
Pijiankang-group2_03985	NODE_683_length_2989_cov_16.8868	CDS	798	1124	+	-	hypothetical protein
Pijiankang-group2_04105	NODE_728_length_2858_cov_9.9759	CDS	1802	2197	+	-	hypothetical protein
Pijiankang-group2_04255	NODE_7_length_41775_cov_8.43955	CDS	8522	10333	-	ltrA_1	Group II intron-encoded protein LtrA	RNA binding
Pijiankang-group2_04271	NODE_7_length_41775_cov_8.43955	CDS	25365	28487	+	-	Papain family cysteine protease
Pijiankang-group2_04272	NODE_7_length_41775_cov_8.43955	CDS	28562	30040	+	-	hypothetical protein
Pijiankang-group2_04273	NODE_7_length_41775_cov_8.43955	CDS	30307	30495	-	-	hypothetical protein
Pijiankang-group2_04307	NODE_80_length_13428_cov_10.2806	CDS	7352	8707	+	-	hypothetical protein
Pijiankang-group2_04308	NODE_80_length_13428_cov_10.2806	CDS	8694	9635	+	-	hypothetical protein
Pijiankang-group2_04377	NODE_83_length_13316_cov_9.88444	CDS	102	605	+	-	hypothetical protein
Pijiankang-group2_04387	NODE_83_length_13316_cov_9.88444	CDS	5452	5880	+	-	hypothetical protein
Pijiankang-group2_04389	NODE_83_length_13316_cov_9.88444	CDS	7043	7516	+	-	SMI1 / KNR4 family protein	Integral component of membrane
Pijiankang-group2_04391	NODE_83_length_13316_cov_9.88444	CDS	9213	9719	+	-	hypothetical protein
Pijiankang-group2_04394	NODE_83_length_13316_cov_9.88444	CDS	11253	11624	+	-	hypothetical protein
Pijiankang-group2_04395	NODE_83_length_13316_cov_9.88444	CDS	11662	12258	+	-	SMI1 / KNR4 family protein	Integral component of membrane
Pijiankang-group2_04484	NODE_87_length_13109_cov_46.6904	CDS	9587	9760	+	rpsE	30S ribosomal protein S5	Response to antibiotic
Pijiankang-group2_04747	NODE_993_length_2307_cov_7.59095	CDS	897	1352	-	-	hypothetical protein
